# Supplementary material for: Metal-substituted hexaaluminates for high-temperature N2O abatement
Source: Royal Society of Chemistry journal article supplement (doi:10.1039/b613602h), 2006-11-24

## SUPPLEMENTARY INFORMATION

This paper © The Royal Society of Chemistry 2006

### Metal-substituted hexaaluminates for high-temperature N<sub>2</sub>O abatement

Javier Pérez-Ramírez and Marta Santiago

The figure shows the N<sub>2</sub>O conversion vs time-on-stream over Ba-Fe-Al hexaaluminate in a mixture simulating the gas at the outlet of the PGM (platinum group metals) gauze pack in ammonia burners. Conditions: feed with 1500 ppm N<sub>2</sub>O, 10 vol.% NO, 10 vol.% O<sub>2</sub>, and 15 vol.% H<sub>2</sub>O, balance He; T = 1073 K, P = 1 bar, and WSHV = 30,000 ml g<sup>-1</sup> h<sup>-1</sup>.

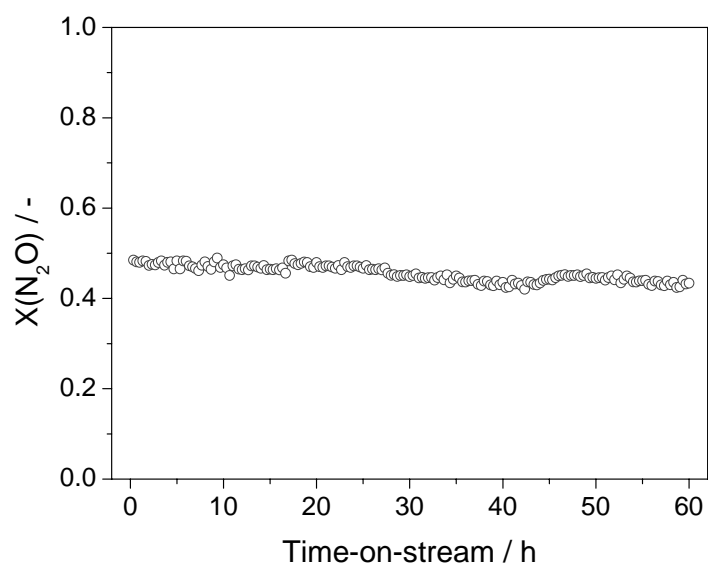

Supplement: esib613602h.pdf [file esib613602h.pdf]
